# Supplementary material for: Assessing the strength of case growth trends in the coronavirus pandemic
Source: R Soc Open Sci. 2020 Nov 25;7(11):201622. doi: 10.1098/rsos.201622 (PMC7735351; doi:10.1098/rsos.201622)
Supplement: Data S2 [file rsos201622supp3.csv]

name	pop2020	cca2
Afghanistan	38928.346	AF
Albania	2877.797	AL
Algeria	43851.044	DZ
American Samoa	55.191	AS
Andorra	77.265	AD
Angola	32866.272	AO
Anguilla	15.003	AI
Antigua and Barbuda	97.929	AG
Argentina	45195.774	AR
Armenia	2963.243	AM
Aruba	106.766	AW
Australia	25499.884	AU
Austria	9006.398	AT
Azerbaijan	10139.177	AZ
Bahamas	393.244	BS
Bahrain	1701.575	BH
Bangladesh	164689.383	BD
Barbados	287.375	BB
Belarus	9449.323	BY
Belgium	11589.623	BE
Belize	397.628	BZ
Benin	12123.2	BJ
Bermuda	62.278	BM
Bhutan	771.608	BT
Bolivia	11673.021	BO
Bosnia and Herzegovina	3280.819	BA
Botswana	2351.627	BW
Brazil	212559.417	BR
British Virgin Islands	30.231	VG
Brunei	437.479	BN
Bulgaria	6948.445	BG
Burkina Faso	20903.273	BF
Burundi	11890.784	BI
Cambodia	16718.965	KH
Cameroon	26545.863	CM
Canada	37742.154	CA
Cape Verde	555.987	CV
Cayman Islands	65.722	KY
Central African Republic	4829.767	CF
Chad	16425.864	TD
Chile	19116.201	CL
China	1439323.776	CN
Colombia	50882.891	CO
Comoros	869.601	KM
Cook Islands	17.564	CK
Costa Rica	5094.118	CR
Croatia	4105.267	HR
Cuba	11326.616	CU
Curacao	164.093	CW
Cyprus	1207.359	CY
Czech Republic	10708.981	CZ
Denmark	5792.202	DK
Djibouti	988	DJ
Dominica	71.986	DM
Dominican Republic	10847.91	DO
DR Congo	89561.403	CD
Ecuador	17643.054	EC
Egypt	102334.404	EG
El Salvador	6486.205	SV
Equatorial Guinea	1402.985	GQ
Eritrea	3546.421	ER
Estonia	1326.535	EE
Ethiopia	114963.588	ET
Falkland Islands	3.48	FK
Faroe Islands	48.863	FO
Fiji	896.445	FJ
Finland	5540.72	FI
France	65273.511	FR
French Guiana	298.682	GF
French Polynesia	280.908	PF
Gabon	2225.734	GA
Gambia	2416.668	GM
Georgia	3989.167	GE
Germany	83783.942	DE
Ghana	31072.94	GH
Gibraltar	33.691	GI
Greece	10423.054	GR
Greenland	56.77	GL
Grenada	112.523	GD
Guadeloupe	400.124	GP
Guam	168.775	GU
Guatemala	17915.568	GT
Guinea	13132.795	GN
Guinea-Bissau	1968.001	GW
Guyana	786.552	GY
Haiti	11402.528	HT
Honduras	9904.607	HN
Hong Kong	7496.981	HK
Hungary	9660.351	HU
Iceland	341.243	IS
India	1380004.385	IN
Indonesia	273523.615	ID
Iran	83992.949	IR
Iraq	40222.493	IQ
Ireland	4937.786	IE
Isle of Man	85.033	IM
Israel	8655.535	IL
Italy	60461.826	IT
Ivory Coast	26378.274	CI
Jamaica	2961.167	JM
Japan	126476.461	JP
Jordan	10203.134	JO
Kazakhstan	18776.707	KZ
Kenya	53771.296	KE
Kiribati	119.449	KI
Kuwait	4270.571	KW
Kyrgyzstan	6524.195	KG
Laos	7275.56	LA
Latvia	1886.198	LV
Lebanon	6825.445	LB
Lesotho	2142.249	LS
Liberia	5057.681	LR
Libya	6871.292	LY
Liechtenstein	38.128	LI
Lithuania	2722.289	LT
Luxembourg	625.978	LU
Macau	649.335	MO
Macedonia	2083.374	MK
Madagascar	27691.018	MG
Malawi	19129.952	MW
Malaysia	32365.999	MY
Maldives	540.544	MV
Mali	20250.833	ML
Malta	441.543	MT
Marshall Islands	59.19	MH
Martinique	375.265	MQ
Mauritania	4649.658	MR
Mauritius	1271.768	MU
Mayotte	272.815	YT
Mexico	128932.753	MX
Micronesia	115.023	FM
Moldova	4033.963	MD
Monaco	39.242	MC
Mongolia	3278.29	MN
Montenegro	628.066	ME
Montserrat	4.992	MS
Morocco	36910.56	MA
Mozambique	31255.435	MZ
Myanmar	54409.8	MM
Namibia	2540.905	NA
Nauru	10.824	NR
Nepal	29136.808	NP
Netherlands	17134.872	NL
New Caledonia	285.498	NC
New Zealand	4822.233	NZ
Nicaragua	6624.554	NI
Niger	24206.644	NE
Nigeria	206139.589	NG
Niue	1.626	NU
North Korea	25778.816	KP
Northern Mariana Islands	57.559	MP
Norway	5421.241	NO
Oman	5106.626	OM
Pakistan	220892.34	PK
Palau	18.094	PW
Palestine	5101.414	PS
Panama	4314.767	PA
Papua New Guinea	8947.024	PG
Paraguay	7132.538	PY
Peru	32971.854	PE
Philippines	109581.078	PH
Poland	37846.611	PL
Portugal	10196.709	PT
Puerto Rico	2860.853	PR
Qatar	2881.053	QA
Republic of the Congo	5518.087	CG
Reunion	895.312	RE
Romania	19237.691	RO
Russia	145934.462	RU
Rwanda	12952.218	RW
Saint Barth�lemy	9.877	BL
Saint Kitts and Nevis	53.199	KN
Saint Lucia	183.627	LC
Saint Martin	38.666	MF
Saint Pierre and Miquelon	5.794	PM
Saint Vincent and the Grenadines	110.94	VC
Samoa	198.414	WS
San Marino	33.931	SM
Sao Tome and Principe	219.159	ST
Saudi Arabia	34813.871	SA
Senegal	16743.927	SN
Serbia	8737.371	RS
Seychelles	98.347	SC
Sierra Leone	7976.983	SL
Singapore	5850.342	SG
Sint Maarten	42.876	SX
Slovakia	5459.642	SK
Slovenia	2078.938	SI
Solomon Islands	686.884	SB
Somalia	15893.222	SO
South Africa	59308.69	ZA
South Korea	51269.185	KR
South Sudan	11193.725	SS
Spain	46754.778	ES
Sri Lanka	21413.249	LK
Sudan	43849.26	SD
Suriname	586.632	SR
Swaziland	1160.164	SZ
Sweden	10099.265	SE
Switzerland	8654.622	CH
Syria	17500.658	SY
Taiwan	23816.775	TW
Tajikistan	9537.645	TJ
Tanzania	59734.218	TZ
Thailand	69799.978	TH
Timor-Leste	1318.445	TL
Togo	8278.724	TG
Tokelau	1.357	TK
Tonga	105.695	TO
Trinidad and Tobago	1399.488	TT
Tunisia	11818.619	TN
Turkey	84339.067	TR
Turkmenistan	6031.2	TM
Turks and Caicos Islands	38.717	TC
Tuvalu	11.792	TV
Uganda	45741.007	UG
Ukraine	43733.762	UA
United Arab Emirates	9890.402	AE
United Kingdom	67886.011	GB
United States	331002.651	US
United States Virgin Islands	104.425	VI
Uruguay	3473.73	UY
Uzbekistan	33469.203	UZ
Vanuatu	307.145	VU
Vatican City	0.801	VA
Venezuela	28435.94	VE
Vietnam	97338.579	VN
Wallis and Futuna	11.239	WF
Western Sahara	597.339	EH
Yemen	29825.964	YE
Zambia	18383.955	ZM
Zimbabwe	14862.924	ZW
